# Supplementary material
Source: publisher site journal article supplement (https://www.dovepress.com/article/369673)
Supplement: Supplementary file 1 [file get_supplementary_file.php]

| **Supplemental Table 1a**: Comparison by years of practice | | | |
| --- | --- | --- | --- |
| Would a randomized clinical trial comparing ECL and IOP control after GDD implantation with tube in anterior chamber versus in ciliary sulcus be beneficial? | | | |
|  | 10 or Less Years Practiced | 11 or More Years Practiced | P-value |
| Very Beneficial | 25 (46.3%) | 34 (45.9%) | 0.7818 |
| Moderately Beneficial | 15 (27.8%) | 15 (20.3%) |  |
| Somewhat Beneficial | 9 (16.7%) | 13 (17.6%) |  |
| Unnecessary | 4 (7.4%) | 9 (12.2%) |  |
| Other | 1 (1.9%) | 3 (4.1%) |  |
| Would a randomized clinical trial comparing postoperative use of prednisolone 1% versus difluprednate 0.05% after GDD implantation be beneficial? | | | |
|  | 10 or Less Years Practiced | 11 or More Years Practiced | P-value |
| Very Beneficial | 20 (37.0%) | 22 (29.7%) | 0.6201 |
| Moderately Beneficial | 14 (25.9%) | 19 (25.7%) |  |
| Somewhat Beneficial | 13 (24.1%) | 17 (23.0%) |  |
| Unnecessary | 7 (13.0%) | 16 (21.6%) |  |
|  | | | |

| **Supplemental Table 1b:** Comparison by years of experience of GDD implantation | | | |
| --- | --- | --- | --- |
| Would a randomized clinical trial comparing ECL and IOP control after GDD implantation with tube in anterior chamber versus in ciliary sulcus be beneficial? | | | |
|  | 10 or Less Years of GDD | 11 or More Years of GDD | P-value |
| Very Beneficial | 23 (44.2%) | 36 (47.4%) | 0.7568 |
| Moderately Beneficial | 15 (28.8%) | 15 (19.7%) |  |
| Somewhat Beneficial | 9 (17.3%) | 13 (17.1%) |  |
| Unnecessary | 4 (7.7%) | 9 (11.8%) |  |
| Other | 1 (1.9%) | 3 (3.9%) |  |
| Would a randomized clinical trial comparing postoperative use of prednisolone 1% versus difluprednate 0.05% after GDD implantation be beneficial? | | | |
|  | 10 or Less Years of GDD | 11 or More Years of GDD | P-value |
| Very Beneficial | 19 (36.5%) | 23 (30.3%) | 0.6247 |
| Moderately Beneficial | 13 (25.0%) | 19 (25.0%) |  |
| Somewhat Beneficial | 13 (25.0%) | 17 (22.4%) |  |
| Unnecessary | 7 (13.5%) | 17 (22.4%) |  |
|  | | | |

| **Supplemental Table 1c**: Comparison by frequency of GDD surgeries performed currently | | | |
| --- | --- | --- | --- |
| Would a randomized clinical trial comparing ECL and IOP control after GDD implantation with tube in anterior chamber versus in ciliary sulcus be beneficial? | | | |
|  | 5 Surgeries or Less | 6 Surgeries or More | P-value |
| Very Beneficial | 39 (43.3%) | 20 (52.6%) | 0.6345 |
| Moderately Beneficial | 25 (27.8%) | 7 (18.4%) |  |
| Somewhat Beneficial | 15 (16.7%) | 5 (13.2%) |  |
| Unnecessary | 9 (10.0%) | 4 (10.5%) |  |
| Other | 2 (2.2%) | 2 (5.3%) |  |
| Would a randomized clinical trial comparing postoperative use of prednisolone 1% versus difluprednate 0.05% after GDD implantation be beneficial? | | | |
|  | 5 Surgeries or Less | 6 Surgeries or More | P-value |
| Very Beneficial | 32 (35.6%) | 12 (31.6%) | 0.9369 |
| Moderately Beneficial | 27 (30.0%) | 11 (28.9%) |  |
| Somewhat Beneficial | 19 (21.1%) | 10 (26.3%) |  |
| Unnecessary | 12 (13.3%) | 5 (13.2%) |  |
|  | | | |

| **Supplemental Table 1d**: Comparison by preferred placement of tube shunt | | | |
| --- | --- | --- | --- |
| Would a randomized clinical trial comparing ECL and IOP control after GDD implantation with tube in anterior chamber versus in ciliary sulcus be beneficial? | | | |
|  | Percentage of AC Surgeries 50% or Less | Percentage of AC Surgeries 51% or More | P-value |
| Very Beneficial | 19 (46.3%) | 40 (46.0%) | 0.6204 |
| Moderately Beneficial | 11 (26.8%) | 19 (21.8%) |  |
| Somewhat Beneficial | 6 (14.6%) | 17 (19.5%) |  |
| Unnecessary | 5 (12.2%) | 7 (8.0%) |  |
| Other | 0 (0.0%) | 4 (4.6%) |  |
| Would a randomized clinical trial comparing postoperative use of prednisolone 1% versus difluprednate 0.05% after GDD implantation be beneficial? | | | |
|  | Percentage of AC Surgeries 50% or Less | Percentage of AC Surgeries 51% or More | P-value |
| Very Beneficial | 14 (34.1%) | 28 (32.2%) | 0.6170 |
| Moderately Beneficial | 11 (26.8%) | 21 (24.1%) |  |
| Somewhat Beneficial | 11 (26.8%) | 19 (21.8%) |  |
| Unnecessary | 5 (12.2%) | 19 (21.8%) |  |
|  | | | |
| **Supplemental Figure 1:** Survey Questions distributed via Qualtrics | | | |
| What is your opinion of the current evidence regarding tube placement for **preventing endothelial cell loss (ECL)** after glaucoma drainage device (GDD) implantation?   - Current evidence supports that tube placement in anterior chamber is superior to tube placement in ciliary sulcus for preventing ECL - Current evidence supports that tube placement in sulcus is superior to tube placement in anterior chamber for preventing ECL - Current evidence suggests there is no difference for preventing ECL between anterior chamber versus ciliary sulcus tube placement - There is not enough evidence to support the superiority of one tube location versus another for preventing ECL - I am not familiar with the literature | | | |
| What is your opinion of the current evidence regarding tube placement for **intraocular pressure (IOP) control** after GDD implantation?   - Current evidence supports that tube placement in anterior chamber is superior to tube placement in ciliary sulcus for IOP control - Current evidence supports that tube placement in sulcus is superior to tube placement in anterior chamber for IOP control - Current evidence suggests there is no difference for IOP control between anterior chamber versus ciliary sulcus tube placement - There is not enough evidence to support the superiority of one tube location versus another for preventing IOP control - I am not familiar with the literature | | | |
| Would a randomized clinical trial comparing ECL and IOP control after GDD implantation with tube in anterior chamber versus in ciliary sulcus be beneficial?   - Very beneficial - Moderately beneficial - Somewhat beneficial - Unnecessary - Other | | | |
| What is the likelihood of changing your GDD surgical technique regarding tube location if the RCT shows tube placement in sulcus tube is superior to tube placement in anterior chamber for preventing ECL?   - Very likely - Moderately likely - Somewhat likely - Not likely - Other | | | |
| What is your opinion of the current evidence for **preventing endothelial cell loss (ECL)** after GDD implantation with a stronger postoperative corticosteroids regimen?   - Current evidence supports the use of topical difluprednate 0.05% is superior to prednisolone 1% post-operatively for preventing ECL - Current evidence supports the use of topical prednisolone 1% is superior to difluprednate 0.05% for preventing ECL - Current evidence suggests there is no difference for preventing ECL with topical prednisolone 1% versus difluprednate 0.05% - There is not enough evidence to support the superiority of difluprednate over prednisolone for prevention of ECL - I am not familiar with the literature | | | |
| What is your opinion of the current evidence for **IOP control** with different postoperative corticosteroids use after GDD implantation?   - Current evidence supports the use of topical difluprednate 0.05% is superior to prednisolone 1% post-operatively for improving IOP control - Current evidence supports the use of topical prednisolone 1% is superior to difluprednate 0.05% for improving IOP control - Current evidence suggests there is no difference for optimal IOP control with post-operative topical prednisolone 1% versus difluprednate 0.05% - There is not enough evidence to support the superiority of difluprednate 0.05% over prednisolone 1% for improved IOP control - I am not familiar with the literature | | | |
| Would a randomized clinical trial comparing postoperative use of prednisolone 1% versus difluprednate 0.05% after GDD implantation be beneficial?   - Very beneficial - Moderately beneficial - Somewhat beneficial - Unnecessary | | | |
| What is the likelihood of changing your postoperative use of corticosteroid after GDD implantation if the RCT shows topical difluprednate 0.05% is superior to prednisolone 1% post-operatively for preventing ECL?   - Very likely - Moderately likely - Somewhat likely - Not likely | | | |
| Which country do you practice in? | | | |
| Did you do a glaucoma fellowship? | | | |
| How many years have you been in practice? | | | |
| How many years have you been performing GDD placement surgery? | | | |
| How many GDD placement surgeries do you perform per month? | | | |
| In your current practice, what percentage of tubes placed in anterior chamber for pseudophakic patients? | | | |
| In your current practice, what percentage of tubes placed in sulcus for pseudophakic patients? | | | |
